# Supplementary material for: Characterization of Aspergillus species associated with dried cocoa beans in Peninsular Malaysia
Source: Research Square preprint supplement (doi:10.21203/rs.3.rs-6760467/v1), 2025-06-06
Supplement: Supplementary file 1 [file 4c199d720fe6c5ca4395c96e.docx]

*Aspergillus caelatus* CBS 763.97

*Aspergillus pseudotamarii* CBS 766.97

*Aspergillus tamarii* CBS 133375

*Aspergillus tamarii* CBS 104.13

*Aspergillus tamarii* CBS 117626

**TA19**

**TA18**

**DT17**

**DT16**

**PJ15**

**PJ14**

**PJ13**

**PJ12**

**BD11**

**DT27**

**DT26**

**SB25**

**SB24**

**PJ23**

**BD22**

**BD21**

**DT28**

**JN29**

**JN210**

*Aspergillus flavus* CBS 100927

*Aspergillus flavus* CBS 100558

*Aspergillus flavus* CBS 816.96

*Aspergillus oryzae* CBS 100925

*Aspergillus oryzae* ATHUM 4958

*Aspergillus oryzae* NRRL 447

*Aspergillus kambarensis* CBS 542.69

*Aspergillus fasciculatus* CBS 110.55

*Aspergillus arachidicola* CBS 117610

*Aspergillus parasiticus* ATHUM 5038

*Aspergillus parasiticus* ATHUM 5037

*Aspergillus parasiticus* CBS 100926

*Aspergillus thomii* CBS 120.51

*Aspergillus terricola* CBS 620.95

**PT51**

**PT52**

**TI53**

**TI54**

**TI55**

**RU56**

**DT57**

*Aspergillus aculeatus* CBS 62078

*Aspergillus fijiensis* CBS 313.89

*Aspergillus aculeatinus* CBS 121060

*Aspergillus aculeatinus* CBS 121871

*Aspergillus aculeatinus* CBS 121877

*Aspergillus aculeatus* CBS 172.66

*Aspergillus aculeatus* CBS 11480

**CR31**

**PJ32**

**PJ33**

**TK34**

**TK35**

**TI36**

**RU37**

**RU38**

**BP39**

*Aspergillus niger* CBS 101705

*Aspergillus niger* CBS 55765

*Aspergillus niger* CBS 42064

*Aspergillus neoniger* NRRL 62634

*Aspergillus neoniger* CBS 115656

*Aspergillus awamori* CBS 557.65

*Aspergillus awamori* ATHUM 5181

*Aspergillus awamori* NRRL 4951

*Aspergillus foetidus* CBS 107.47

*Aspergillus foetidus* CBS 564.65

*Aspergillus foetidus* NRRL 4750

**CR41**

**PJ42**

**TK43**

**JN44**

**JN45**

**JN46**

**BP47**

**BP48**

*Aspergillus tubingensis* CBS 42565

*Aspergillus tubingensis* CBS 134.48

*Aspergillus tubingensis* CBS 11732

*Aspergillus sydowii* CBS 593.65

87

80

100

48

100

63

44

49

0.020

**Supplementary Figure 1.** Maximum likelihood (ML) tree based on ITS sequences. Isolates from this study are shown in bold, and *Aspergillus sydowii* is used as the outgroup. Bootstrap values ≥70% are shown at the nodes.
