# Supplementary material for: Characterization of Aspergillus species associated with dried cocoa beans in Peninsular Malaysia
Source: Research Square preprint supplement (doi:10.21203/rs.3.rs-6760467/v1), 2025-06-06
Supplement: Supplementary file 2 [file 7ff2f691621df2ba7c70fe7e.docx]

**Table 1** Fungal isolates and their corresponding GenBank accession numbers used in the phylogenetic analysis

| ***Aspergillus* species** | **Isolate** | **Host** | **Locality** | **GenBank accession number** | | **Reference** |
| --- | --- | --- | --- | --- | --- | --- |
| **ITS** | ***tub2*** |
| *A. aculeatinus* | CBS 121060ET | *Coffea arabica* | Thailand | EU159211 | EU159220 | Noonim et al. 2008 |
| *A. aculeatinus* | CBS 121871 | *Coffea robusta* | Thailand | EU159206 | EU159227 | Noonim et al. 2008 |
| *A. aculeatinus* | CBS 121877 | *Coffee arabica* | Thailand | EU159213 | EU159224 | Noonim et al. 2008 |
| *A. aculeatus* | CBS 172.66ET | Soil | India | FJ629320 | FJ629271 | Varga et al. 2011 |
| *A. aculeatus* | CBS 11480 | Soil | India | AY585557 | AY585539 | Noonim et al. 2008 |
| *A. aculeatus* | CBS 62078 | Unknown | Not stated | AY585556 | AY585538 | Noonim et al. 2008 |
| *A. aculeatus* | **DT57** | *Theobroma cacao* | Malaysia: Melaka | PQ835672 | PV654129 | Present study |
| *A. aculeatus* | **PT51** | *Theobroma cacao* | Malaysia: Penang | PQ835666 | PV654123 | Present study |
| *A. aculeatus* | **PT52** | *Theobroma cacao* | Malaysia: Penang | PQ835667 | PV654124 | Present study |
| *A. aculeatus* | **TI53** | *Theobroma cacao* | Malaysia: Negeri Sembilan | PQ835668 | PV654125 | Present study |
| *A. aculeatus* | **TI54** | *Theobroma cacao* | Malaysia: Negeri Sembilan | PQ835669 | PV654126 | Present study |
| *A. aculeatus* | **TI55** | *Theobroma cacao* | Malaysia: Negeri Sembilan | PQ835670 | PV654127 | Present study |
| *A. aculeatus* | **RU56** | *Theobroma cacao* | Malaysia: Negeri Sembilan | PQ835671 | PV654128 | Present study |
| *A. arachidicola* | CBS 117610ET | *Arachis glabrata* | Argentina | EF409241 | EF203158 | Pildain et al. 2008 |
| *A. awamori* | CBS 557.65ET | Unknown | Not stated | AM087614 | AY820001 | Samson et al. 2004 |
| *A. awamori* | ATHUM 5181 | Unknown | Greece | EU982010 | EU982069 | Krimitzas et al. 2013 |
| *A. awamori* | NRRL 4951 | Unknown | Brazil | KC796388 | KC796358 | Krimitzas et al. 2013 |
| *A. caelatus* | CBS 763.97ET | Soil | USA | MH862672 | EF203127 | Varga et al. 2011 |
| *A. fasciculatus* | CBS 110.55ET | Air contaminant | Brazil | FJ491463 | EF203135 | Varga et al. 2011 |
| *A. fijiensis* | CBS 313.89ET | Soil | Fiji | FJ491680 | FJ491688 | Varga et al. 2011 |
| *A. flavus* | CBS 100927EN | Cellophane | South Pacific Islands | MH864264 | KJ175479 | Frisvad et al. 2019 |
| *A. flavus* | CBS 100558 | Peanut | Indonesia | MG517645 | KJ175478 | Frisvad et al. 2019 |
| *A. flavus* | CBS 816.96 | *Arachis hypogea* | Brazil | MG517628 | MG518011 | Frisvad et al. 2019 |
| *A. flavus* | **BD21** | *Theobroma cacao* | Malaysia: Perak | PQ835646 | PQ839564 | Present study |
| *A. flavus* | **BD22** | *Theobroma cacao* | Malaysia: Perak | PQ835647 | PQ839565 | Present study |
| *A. flavus* | **DT26** | *Theobroma cacao* | Malaysia: Melaka | PQ835651 | PQ839569 | Present study |
| *A. flavus* | **DT27** | *Theobroma cacao* | Malaysia: Melaka | PQ835652 | PQ839570 | Present study |
| *A. flavus* | **DT28** | *Theobroma cacao* | Malaysia: Melaka | PQ835653 | PQ839571 | Present study |
| *A. flavus* | **JN29** | *Theobroma cacao* | Malaysia: Melaka | PQ835654 | PQ839572 | Present study |
| *A. flavus* | **JN210** | *Theobroma cacao* | Malaysia: Melaka | PQ835655 | PQ839573 | Present study |
| *A. flavus* | **PJ23** | *Theobroma cacao* | Malaysia: Penang | PQ835648 | PQ839566 | Present study |
| *A. flavus* | **SB24** | *Theobroma cacao* | Malaysia: Penang | PQ835649 | PQ839567 | Present study |
| *A. flavus* | **SB25** | *Theobroma cacao* | Malaysia: Penang | PQ835650 | PQ839568 | Present study |
| *A. foetidus* | CBS 564.65 | Unknown | Japan | FJ629329 | GU296697 | Samson et al. 2004 |
| *A. foetidus* | NRRL 4750 | Alcoholic beverage | Japan | FJ491683 | FJ491690 | Varga et al. 2011 |
| *A. kambarensis* | CBS 542.69ET | Unknown | Japan | FJ491468 | EF203136 | Samson et al. 2004 |
| *A. neoniger* | CBS 115656ET | Mangrove water | Venezuela | FJ491682 | FJ491691 | Varga et al. 2011 |
| *A. neoniger* | NRRL 62634 | Mangrove water | Venezuela | KC796401 | KC796361 | Varga et al. 2011 |
| *A. niger* | CBS 42064ET | Unknown | Not stated | AY585553 | AY820002 | Samson et al. 2004 |
| *A. niger* | CBS 55765 | Unknown | USA | EF661186 | AY820001 | Samson et al. 2004 |
| *A. niger* | CBS 101705 | Carpet dust | Canada | FJ629343 | AY820005 | Samson et al. 2004 |
| *A. niger* | **BP39** | *Theobroma cacao* | Malaysia: Johor | PQ835665 | PQ839599 | Present study |
| *A. niger* | **CR31** | *Theobroma cacao* | Malaysia: Perak | PQ835657 | PQ839591 | Present study |
| *A. niger* | **PJ32** | *Theobroma cacao* | Malaysia: Penang | PQ835658 | PQ839592 | Present study |
| *A. niger* | **PJ33** | *Theobroma cacao* | Malaysia: Penang | PQ835659 | PQ839593 | Present study |
| *A. niger* | **TK34** | *Theobroma cacao* | Malaysia: Selangor | PQ835660 | PQ839594 | Present study |
| *A. niger* | **TK35** | *Theobroma cacao* | Malaysia: Selangor | PQ835661 | PQ839595 | Present study |
| *A. niger* | **TI36** | *Theobroma cacao* | Malaysia: Negeri Sembilan | PQ835662 | PQ839596 | Present study |
| *A. niger* | **RU37** | *Theobroma cacao* | Malaysia: Negeri Sembilan | PQ835663 | PQ839597 | Present study |
| *A. niger* | **RU38** | *Theobroma cacao* | Malaysia: Negeri Sembilan | PQ835664 | PQ839598 | Present study |
| *A. oryzae* | CBS 100925ET | *Arachis hypogaea* | Argentina | KJ175432 | EF203138 | Pildain et al. 2008 |
| *A. oryzae* | NRRL 447ET | *Eurotium oryzae* | USA | NR_135395 | EF661483 | Peterson 2008 |
| *A. oryzae* | ATHUM 4958 | Indoor air | Greece | EU982022 | EU982081 | Krimitzas et al. 2013 |
| *A. parasiticus* | CBS 100926EN | *Arachis hypogaea* | Argentina | KJ175437 | EF203155 | Pildain et al. 2008 |
| *A. parasiticus* | ATHUM 5037 | Indoor air | Greece | EU982020 | EU982079 | Krimitzas et al. 2013 |
| *A. parasiticus* | ATHUM 5038 | Indoor air | Greece | EU982021 | EU982080 | Krimitzas et al. 2013 |
| *A. pseudotamarii* | CBS 766.97ET | Soil | USA | MH862673 | EF203125 | Varga et al. 2011 |
| *A. tamarii* | CBS 104.13ET | Activated carbon | Unknown origin | MH854614 | EF203123 | Frisvad et al. 2019 |
| *A. tamarii* | CBS 117626 | *Arachis hypogaea* | Argentina | NR_135325 | EF203122 | Pildain et al. 2008 |
| *A. tamarii* | CBS 133375 | Indoor air | Germany | MH279382 | MH279885 | Frisvad et al. 2019 |
| *A. tamarii* | **BD11** | *Theobroma cacao* | Malaysia: Perak | PQ835674 | PQ839574 | Present study |
| *A. tamarii* | **DT16** | *Theobroma cacao* | Malaysia: Melaka | PQ835679 | PQ839579 | Present study |
| *A. tamarii* | **DT17** | *Theobroma cacao* | Malaysia: Melaka | PQ835680 | PQ839580 | Present study |
| *A. tamarii* | **PJ12** | *Theobroma cacao* | Malaysia: Penang | PQ835675 | PQ839575 | Present study |
| *A. tamarii* | **PJ13** | *Theobroma cacao* | Malaysia: Penang | PQ835676 | PQ839576 | Present study |
| *A. tamarii* | **PJ14** | *Theobroma cacao* | Malaysia: Penang | PQ835677 | PQ839577 | Present study |
| *A. tamarii* | **PJ15** | *Theobroma cacao* | Malaysia: Penang | PQ835678 | PQ839578 | Present study |
| *A. tamarii* | **TA18** | *Theobroma cacao* | Malaysia: Johor | PQ835681 | PQ839581 | Present study |
| *A. tamarii* | **TA19** | *Theobroma cacao* | Malaysia: Johor | PQ835682 | PQ839582 | Present study |
| *A. terricola* | CBS 620.95 | Soil | USA | FJ531244 | FJ491476 | Varga et al. 2011 |
| *A. thomii* | CBS 120.51ET | Culture contaminant | Not stated | MH856773 | EF203133 | Pildain et al. 2008 |
| *A. tubingensis* | CBS 11732ET | Kuro-koji | Japan | GQ379912 | AY820012 | Samson et al. 2004 |
| *A. tubingensis* | CBS 42565 | Unknown | Japan | NR_131293 | AY820009 | Samson et al. 2004 |
| *A. tubingensis* | CBS 134.48 | Unknown | Not stated | FJ629354 | FJ629305 | Noonim et al. 2008 |
| *A. tubingensis* | **BP47** | *Theobroma cacao* | Malaysia: Johor | PQ835690 | PQ839589 | Present study |
| *A. tubingensis* | **BP48** | *Theobroma cacao* | Malaysia: Johor | PQ835691 | PQ839590 | Present study |
| *A. tubingensis* | **CR41** | *Theobroma cacao* | Malaysia: Perak | PQ835684 | PQ839583 | Present study |
| *A. tubingensis* | **JN44** | *Theobroma cacao* | Malaysia: Melaka | PQ835687 | PQ839586 | Present study |
| *A. tubingensis* | **JN45** | *Theobroma cacao* | Malaysia: Melaka | PQ835688 | PQ839587 | Present study |
| *A. tubingensis* | **JN46** | *Theobroma cacao* | Malaysia: Melaka | PQ835689 | PQ839588 | Present study |
| *A. tubingensis* | **PJ42** | *Theobroma cacao* | Malaysia: Penang | PQ835685 | PQ839584 | Present study |
| *A. tubingensis* | **TK43** | *Theobroma cacao* | Malaysia: Selangor | PQ835686 | PQ839585 | Present study |
| *A. sydowii* | CBS 593.65ET | Dairy product | Greece | EU982025 | EF652274 | Krimitzas et al. 2013 |

ENEx-neotype culture, ETEx-type culture
