# Supplementary material for: Characterization of Aspergillus species associated with dried cocoa beans in Peninsular Malaysia
Source: Research Square preprint supplement (doi:10.21203/rs.3.rs-6760467/v1), 2025-06-06
Supplement: Supplementary file 3 [file e49f97366c4c5f3fd8fc27bd.docx]

**Supplementary Figure 2.** Maximum likelihood (ML) tree based on *tub2* sequences. Isolates from this study are shown in bold, and *Aspergillus sydowii* is used as the outgroup. Bootstrap values ≥70% are shown at the nodes.
