# Supplementary material for: Characterization of Aspergillus species associated with dried cocoa beans in Peninsular Malaysia
Source: Research Square preprint supplement (doi:10.21203/rs.3.rs-6760467/v1), 2025-06-06
Supplement: Supplementary file 4 [file eef2a8bfccc09732b14abe83.docx]

**Table 2** *Aspergillus* species isolated from dried cocoa beans collected across various locations in Peninsular Malaysia. The table includes fungal enumeration (CFU/g), sequence similarity to reference isolates in GenBank, and fluorescence intensity on coconut cream agar (CCA)

| Sampling location | aFungal enumeration (CFU/g) | Fungal species | Fungal code | Sequence similarity with GenBank | | bFluorescence on CCA |
| --- | --- | --- | --- | --- | --- | --- |
| ITS | *tub2* |
| Bagan Datuk, Perak | 1.3 x 10³ | *A. flavus* | BD21 | MH864264 (100%) | KJ175479 (99%)  KJ175478 (98%) | + |
| BD22 | MH864264 (100%) | KJ175479 (99%)  KJ175478 (98%) | + |
| *A. tamarii* | BD11 | MH854614 (99%) | EF203122 (100%)  EF203123 (99%) | + |
| Chemor, Perak | 1.1 x 10³ | *A. niger* | CR31 | AY585553 (99%) | AY820002 (99%)  AY820001 (98%) | ++ |
| *A. tubingensis* | CR41 | FJ629354 (100%) | FJ629305 (98%)  AY820009 (99%) | + |
| Pokok Jenerih, Penang | 2.9 x 10⁵ | *A. flavus* | PJ23 | MH864264 (100%) | KJ175479 (99%)  KJ175478 (98%) | + |
| *A. niger* | PJ32 | AY585553 (99%) | AY820002 (99%)  AY820001 (98%) | ++ |
| PJ33 | AY585553 (99%) | AY820002 (99%)  AY820001 (98%) | ++ |
| *A. tamarii* | PJ12 | MH854614 (99%) | EF203122 (100%)  EF203123 (99%) | + |
| PJ13 | MH854614 (99%) | EF203122 (100%)  EF203123 (99%) | + |
| PJ14 | MH854614 (99%) | EF203122 (100%)  EF203123 (99%) | + |
| PJ15 | MH854614 (99%) | EF203122 (100%)  EF203123 (99%) | + |
| *A. tubingensis* | PJ42 | FJ629354 (100%) | FJ629305 (98%)  AY820009 (99%) | + |
| Sungai Bakap, Penang | 1.2 x 10³ | *A. flavus* | SB24 | MH864264 (100%) | KJ175479 (99%)  KJ175478 (98%) | + |
| SB25 | MH864264 (100%) | KJ175479 (99%)  KJ175478 (98%) | + |
| Tanjung Karang, Selangor | 1.8 x 10³ | *A. niger* | TK34 | AY585553 (99%) | AY820002 (99%)  AY820001 (98%) | ++ |
| TK35 | AY585553 (99%) | AY820002 (99%)  AY820001 (98%) | ++ |
| *A. tubingensis* | TK43 | FJ629354 (100%) | FJ629305 (98%)  AY820009 (99%) | + |
| Parit Tujuh, Selangor | 2.2 x 10³ | *A. aculeatus* | PT51 | FJ629320 (100%) | FJ629271(99%)  AY585538 (99%) | + |
| PT52 | FJ629320 (100%) | FJ629271(99%)  AY585538 (99%) | + |
| Tanjung Ipoh, Negeri Sembilan | 1.4 x 10³ | *A. aculeatus* | TI53 | FJ629320 (100%) | FJ629271(99%)  AY585538 (99%) | + |
| TI54 | FJ629320 (100%) | FJ629271(99%)  AY585538 (99%) | + |
| TI55 | FJ629320 (100%) | FJ629271(99%)  AY585538 (99%) | + |
| *A. niger* | TI36 | AY585553 (99%) | AY820002 (99%)  AY820001 (98%) | ++ |
| Rembau, Negeri Sembilan | 2.4 x 10³ | *A. aculeatus* | RU56 | FJ629320 (100%) | FJ629271(99%)  AY585538 (99%) | + |
| *A. niger* | RU37 | AY585553 (99%) | AY820002 (99%)  AY820001 (98%) | ++ |
| RU38 | AY585553 (99%) | AY820002 (99%)  AY820001 (98%) | ++ |
| Durian Tunggal, Melaka | 1.8 x 10³ | *A. aculeatus* | DT57 | FJ629320 (100%) | FJ629271(99%)  AY585538 (99%) | + |
| *A. flavus* | DT26 | MH864264 (100%) | KJ175479 (99%)  KJ175478 (98%) | + |
| DT27 | MH864264 (100%) | KJ175479 (99%)  KJ175478 (98%) | + |
| DT28 | MH854614 (99%) | KJ175479 (99%)  KJ175478 (98%) | + |
| *A. tamarii* | DT16 | MH854614 (99%) | EF203122 (100%)  EF203123 (99%) | + |
| DT17 | MH854614 (99%) | EF203122 (100%)  EF203123 (99%) | + |
| Jasin, Melaka | 2.0 x 10³ | *A. flavus* | JN29 | MH864264 (100%) | KJ175479 (99%)  KJ175478 (98%) | + |
| JN210 | MH864264 (100%) | KJ175479 (99%)  KJ175478 (98%) | + |
| *A. tubingensis* | JN44 | FJ629354 (100%) | FJ629305 (98%)  AY820009 (99%) | + |
| JN45 | FJ629354 (100%) | FJ629305 (98%)  AY820009 (99%) | + |
| JN46 | FJ629354 (100%) | FJ629305 (98%)  AY820009 (99%) | + |
| Batu Pahat, Johor | 1.8 x 103 | *A. niger* | BP39 | AY585553 (99%) | AY820002 (99%)  AY820001 (98%) | ++ |
| *A. tubingensis* | BP47 | FJ629354 (100%) | FJ629305 (98%)  AY820009 (99%) | + |
| BP48 | FJ629354 (100%) | FJ629305 (98%)  AY820009 (99%) | + |
| Tangkak, Johor | 1.4 x 10³ | *A. tamarii* | TA18 | MH854614 (99%) | EF203122 (100%)  EF203123 (99%) | + |
| TA19 | MH854614 (99%) | EF203122 (100%)  EF203123 (99%) | + |

aMaximum limit (1 x 10⁴ CFU/g) according to the hygienic quality of food (Good Manufacturing Practice 2008).

bFluorescence intensity levels observed: ‘+’ indicates low intensity, and ‘++’ indicates moderate intensity. No high intensity fluorescence was detected.
